# Supplementary material
Source: Springer Nature journal article supplement (https://www.springermedizin.de/resource/supplementary/12985_2011_1603_MOESM2_ESM.pdf/9610182)

**(A)**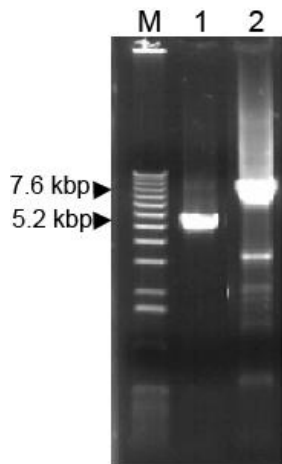**(B)**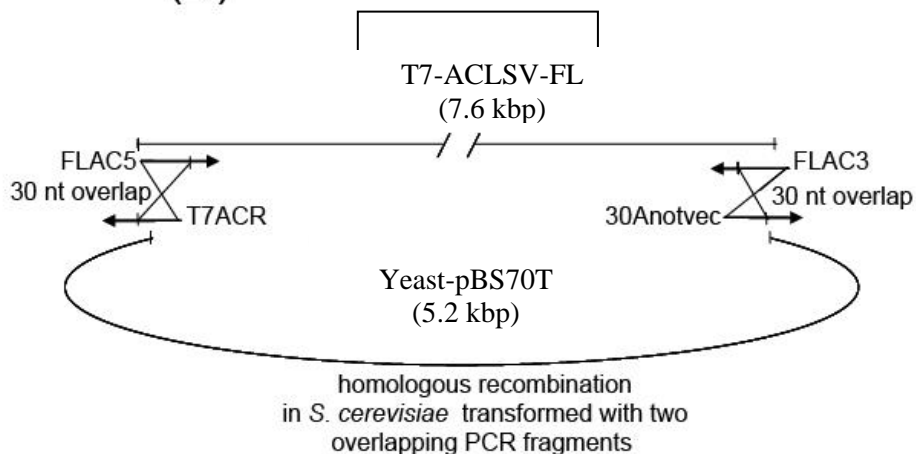**(C)**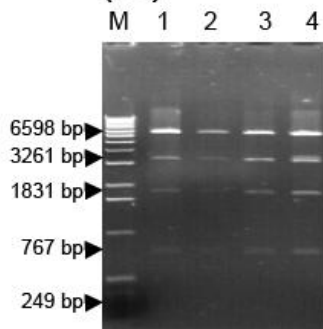**(D)**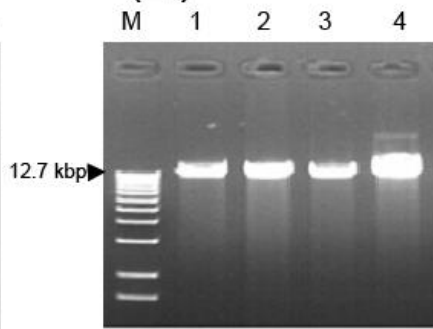**(E)**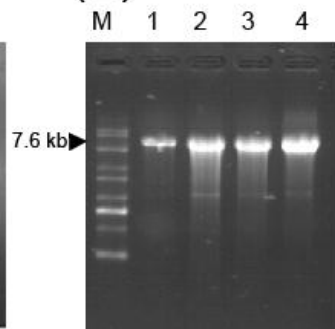

Supplement: MOESM2 [file 9610182]
